# Supplementary material
Source: HighWire-hosted journal article supplement (https://bmjopen.bmj.com/content/9/8/e029851)
Supplement: inline-supplementary-material-1 [file inline-supplementary-material-1.pdf]

**Supplementary file 1. Encounter data collected.**

|                         |                      |                                                                                                                                                                                                  |
|-------------------------|----------------------|--------------------------------------------------------------------------------------------------------------------------------------------------------------------------------------------------|
| Chiropractor Data       | Demographics         | Age, gender                                                                                                                                                                                      |
|                         | Practice related     | Years in practice, style of practice, treatment approach, number patients seen weekly, interprofessional collaboration                                                                           |
| Patient Encounter Data  | General information  | Date of consultation, third party information                                                                                                                                                    |
|                         | Clinical information | Problems/diagnoses, diagnostic tests ordered (e.g. imaging), techniques and care provided, other recommendations (e.g. diet, exercises, nutritional supplements, counselling, advice, education) |
| Patient Characteristics | Demographics         | Age, gender, residence, background                                                                                                                                                               |
|                         | Encounter related    | Reason for encounter, source of referral, duration of problem                                                                                                                                    |
|                         | Health status        | Self-rated health, co-morbidities                                                                                                                                                                |
