# Supplementary material
Source: HighWire-hosted journal article supplement (https://bmjopen.bmj.com/content/9/8/e029851)
Supplement: inline-supplementary-material-2 [file inline-supplementary-material-2.pdf]

**Supplementary file 2:** Lifestyle characteristics of adult (18 years or older) patients as recorded in encounters

| <b>Quality of life questions</b>         | <b>Number<br/>(n=1505)</b> | <b>Percent of<br/>encounters</b> |
|------------------------------------------|----------------------------|----------------------------------|
| <b>Health rating</b>                     |                            |                                  |
| Excellent/very good                      | 779                        | 53.54                            |
| Good                                     | 520                        | 35.74                            |
| Fair/poor                                | 156                        | 10.72                            |
| <b>Quality of life rating</b>            |                            |                                  |
| Excellent/very good                      | 1282                       | 88.11                            |
| Good                                     | 138                        | 9.48                             |
| Fair/poor                                | 35                         | 2.41                             |
| <b>Satisfaction with health</b>          |                            |                                  |
| Very satisfied/satisfied                 | 1062                       | 73.04                            |
| Neither satisfied nor unsatisfied        | 231                        | 15.89                            |
| Fairly dissatisfied/dissatisfied         | 161                        | 11.07                            |
| <b>Physical pain prevents activities</b> |                            |                                  |
| Not at all                               | 481                        | 33.15                            |
| A small/moderate amount                  | 639                        | 44.04                            |
| A great deal/an extreme amount           | 331                        | 22.81                            |
